# Supplementary material
Source: publisher site journal article supplement (https://www.dovepress.com/article/392533)
Supplement: Supplementary file 1 [file get_supplementary_file.php]

Table S1. Summary of adverse drug reactions of esomeprazole for DR formulation or EC formulation by systemic organ class and preferred term

| System organ class  Preferred term | 20 mg dose group | | | 40 mg dose group | | |
| --- | --- | --- | --- | --- | --- | --- |
| DR formulation  (N=39) | EC formulation  (N=41) | Total  (N=42) | DR formulation  (N=46) | EC formulation  (N=45) | Total  (N=46) |
| Total | 3 (7.69) [3] | 1 (2.44) [2] | 3 (7.14) [5] | 6 (13.04) [10] | 5 (11.11) [8] | 9 (19.57) [18] |
| Eye disorders | - | - | - | 1 (2.17) [1] | - | 1 (2.17) [1] |
| Blepharospasm | - | - | - | 1 (2.17) [1] | - | 1 (2.17) [1] |
| Gastrointestinal disorders | 2 (5.13) [2] | 1 (2.44) [2] | 2 (4.76) [4] | 4 (8.70) [4] | 4 (8.89) [4] | 6 (13.04) [8] |
| Abdominal discomfort | - | 1 (2.44) [1] | 1 (2.38) [1] | - | 1 (2.22) [1] | 1 (2.17) [1] |
| Abdominal pain | 1 (2.56) [1] | - | 1 (2.38) [1] | 1 (2.17) [1] | 2 (4.44) [2] | 2 (4.35) [3] |
| Diarrhoea | 1 (2.56) [1] | 1 (2.44) [1] | 2 (4.76) [2] | - | - | - |
| Dyspepsia | - | - | - | 1 (2.17) [1] | - | 1 (2.17) [1] |
| Nausea | - | - | - | 2 (4.35) [2] | 1 (2.22) [1] | 2 (4.35) [3] |
| Nervous system disorders | - | - | - | 3 (6.52) [3] | 1 (2.22) [1] | 3 (6.52) [4] |
| Headache | - | - | - | 3 (6.52) [3] | 1 (2.22) [1] | 3 (6.52) [4] |
| Respiratory, thoracic and mediastinal disorders | 1 (2.56) [1] | - | 1 (2.38) [1] | - | - | - |
| Hyperventilation | 1 (2.56) [1] | - | 1 (2.38) [1] | - | - | - |
| Skin and subcutaneous tissue disorders | - | - | - | 1 (2.17) [2] | 2 (4.44) [3] | 3 (6.52) [5] |
| Acne | - | - | - | - | 2 (4.44) [2] | 2 (6.52) [2] |
| Pruritus | - | - | - | 1 (2.17) [1] | 1 (2.22) [1] | 2 (6.52) [2] |
| Rash | - | - | - | 1 (2.17) [1] | - | 1 (2.17) [1] |

**Notes:** Data are displayed as the number of subjects (percentage of subjects) [number of events].

**Abbreviations:** DR, dual delayed-release; EC, enteric-coated.

| (A) | 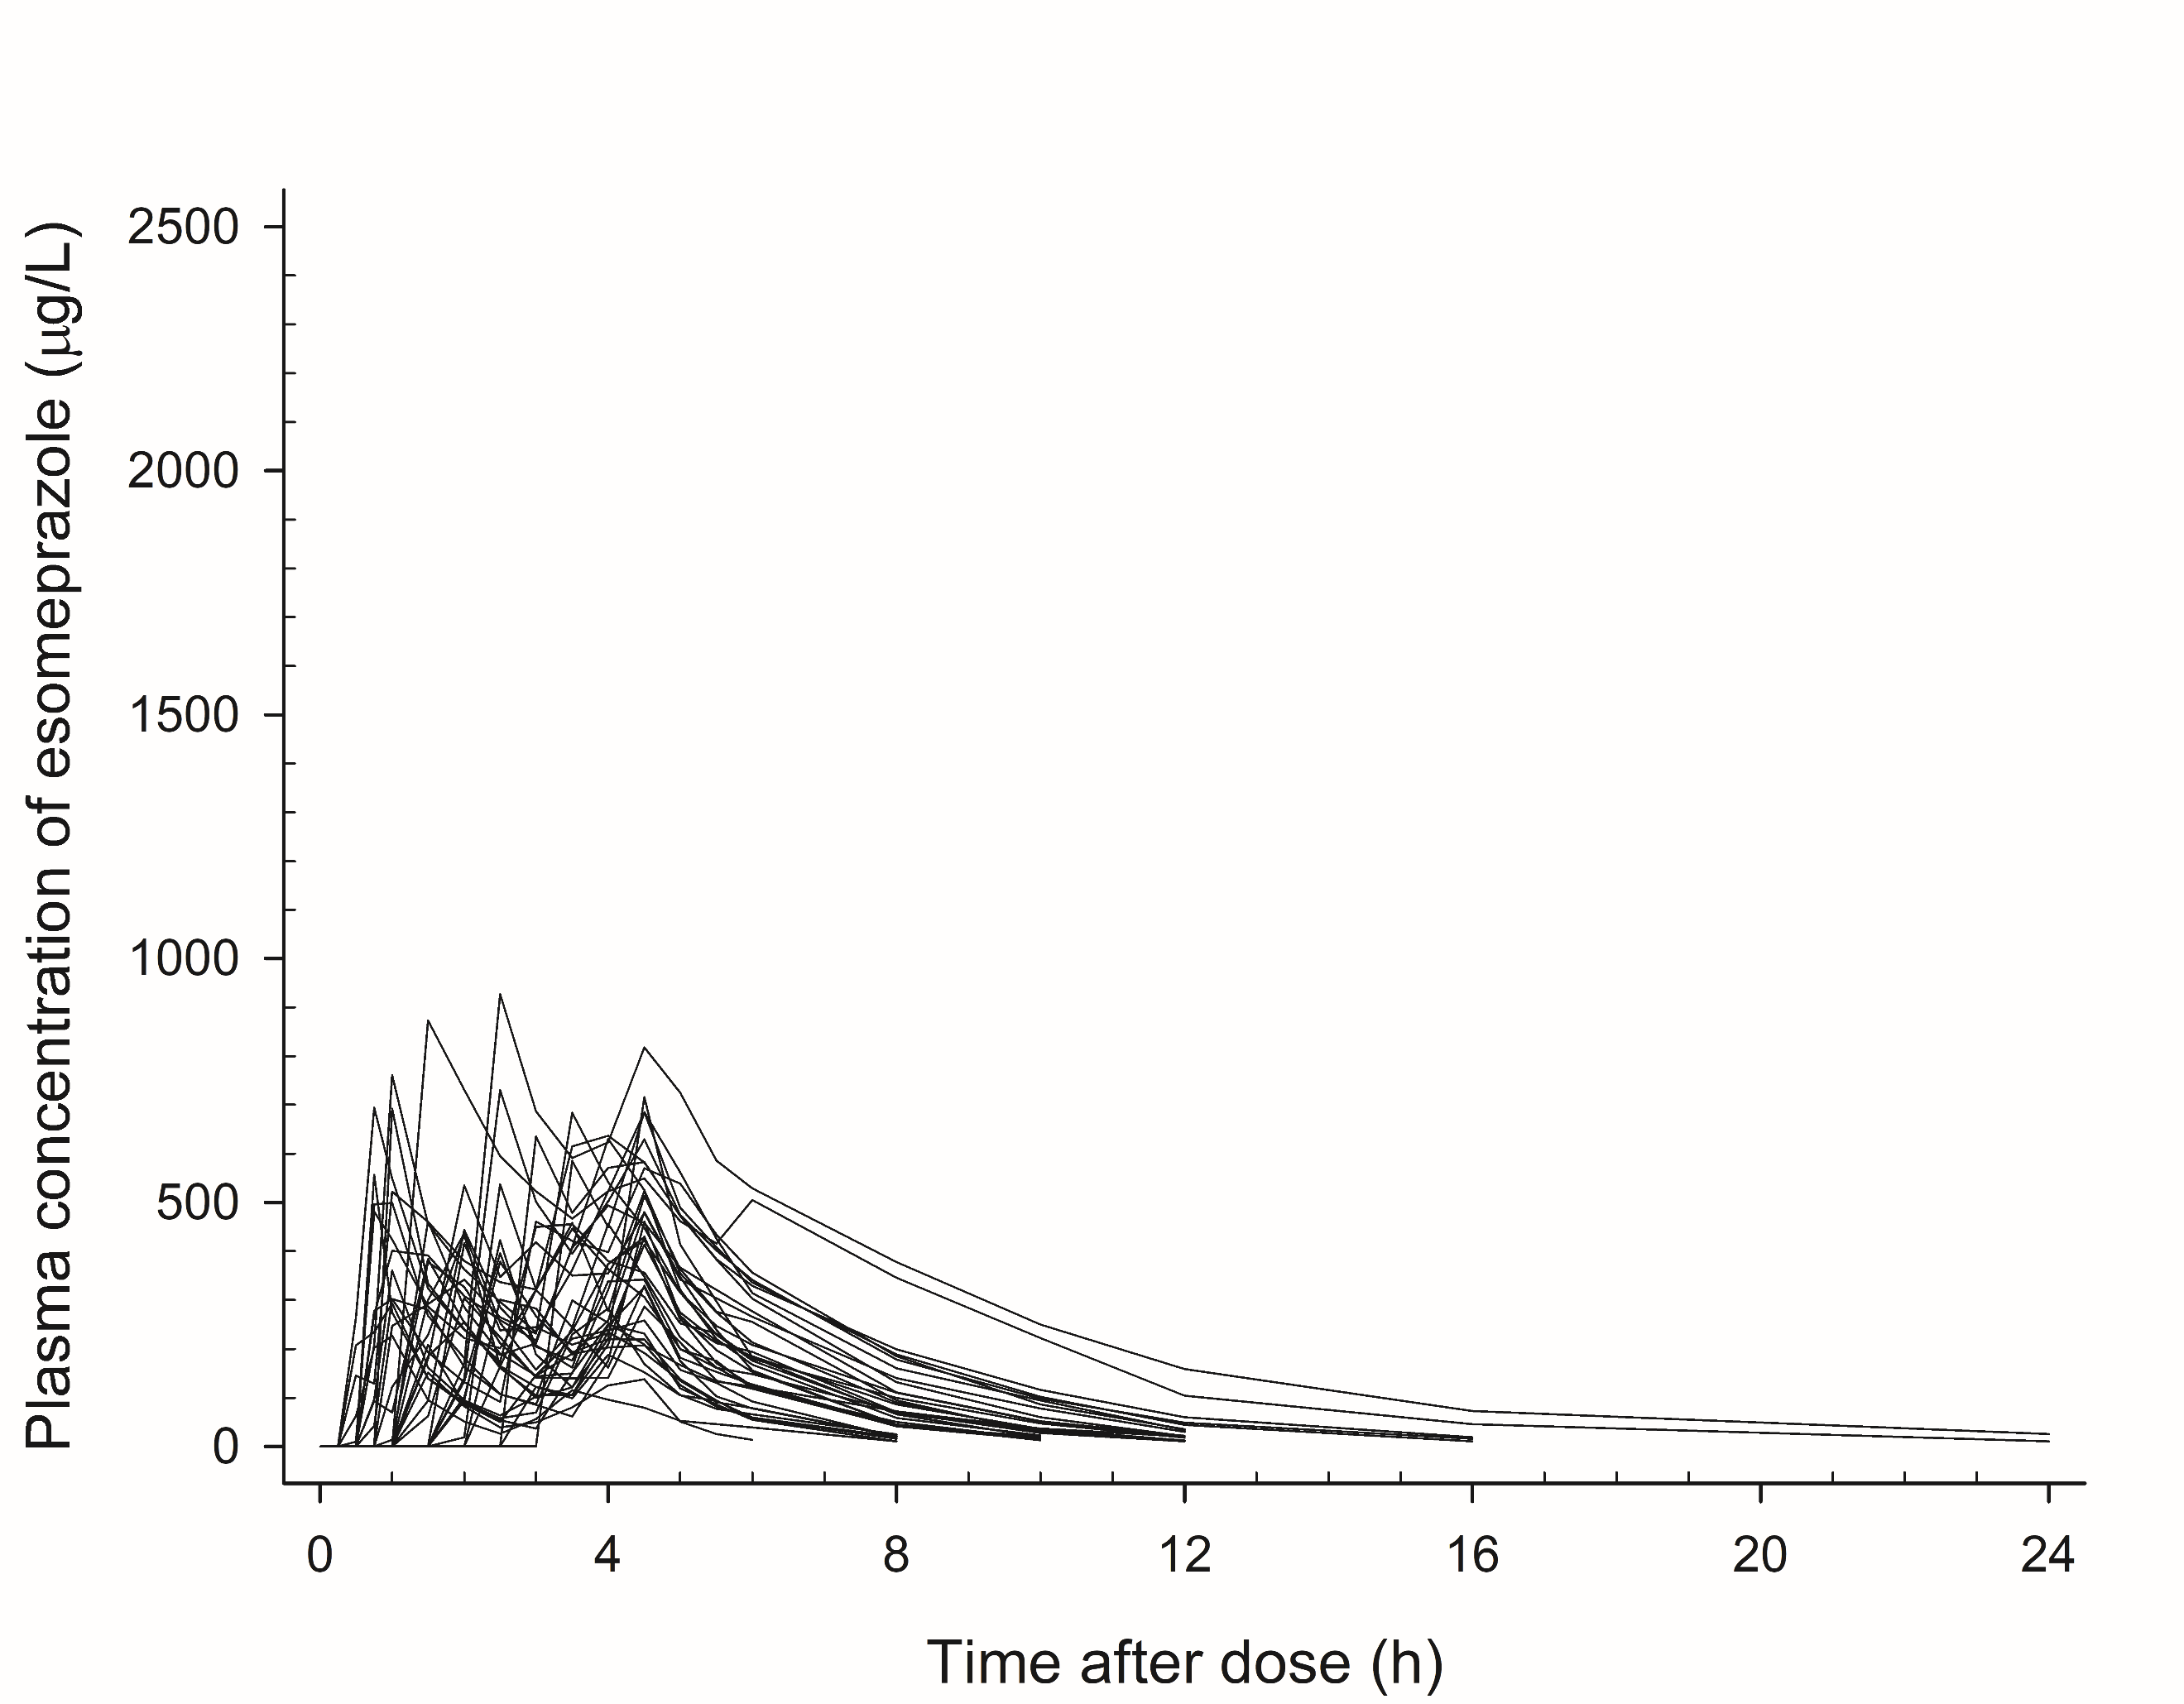 | (B) | 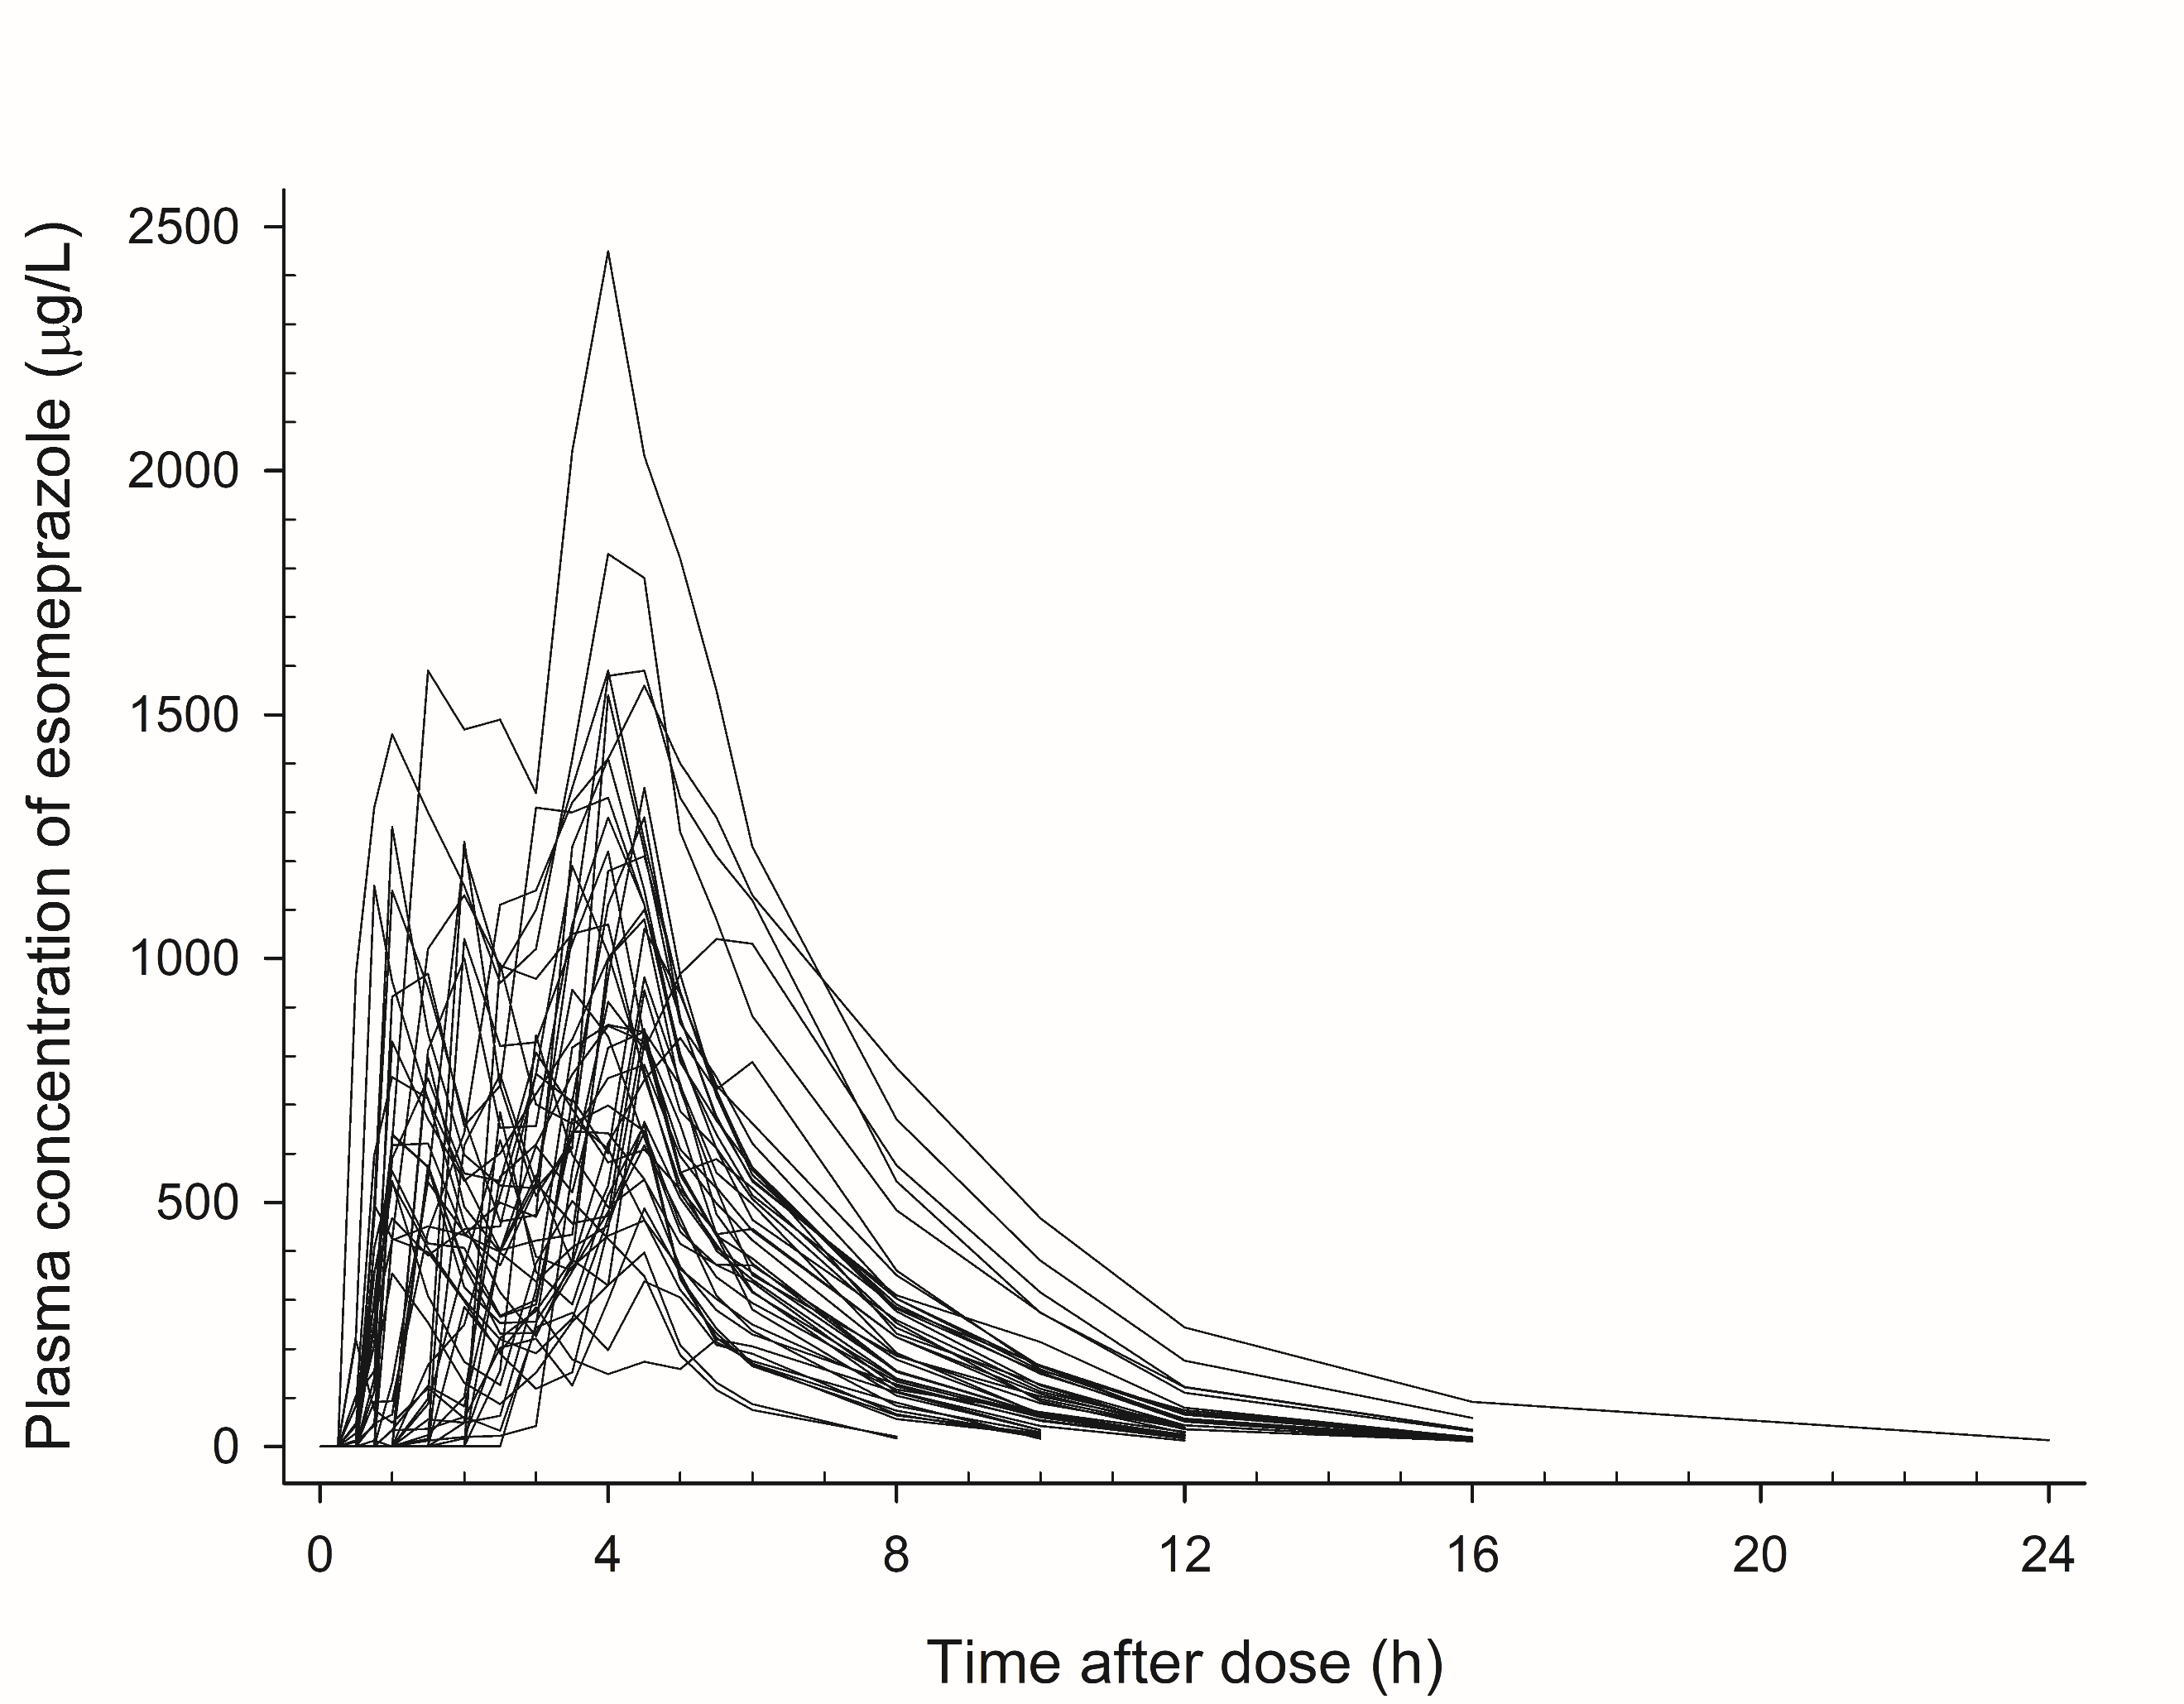 |
| --- | --- | --- | --- |

Figure S1. Spaghetti plot of individual plasma concentration-time profiles of esomeprazole after the 1st dose of DR formulation in (A) 20 mg and (B) 40 mg dose groups.

**Abbreviations:** DR, dual delayed-release.

| **(A)** | **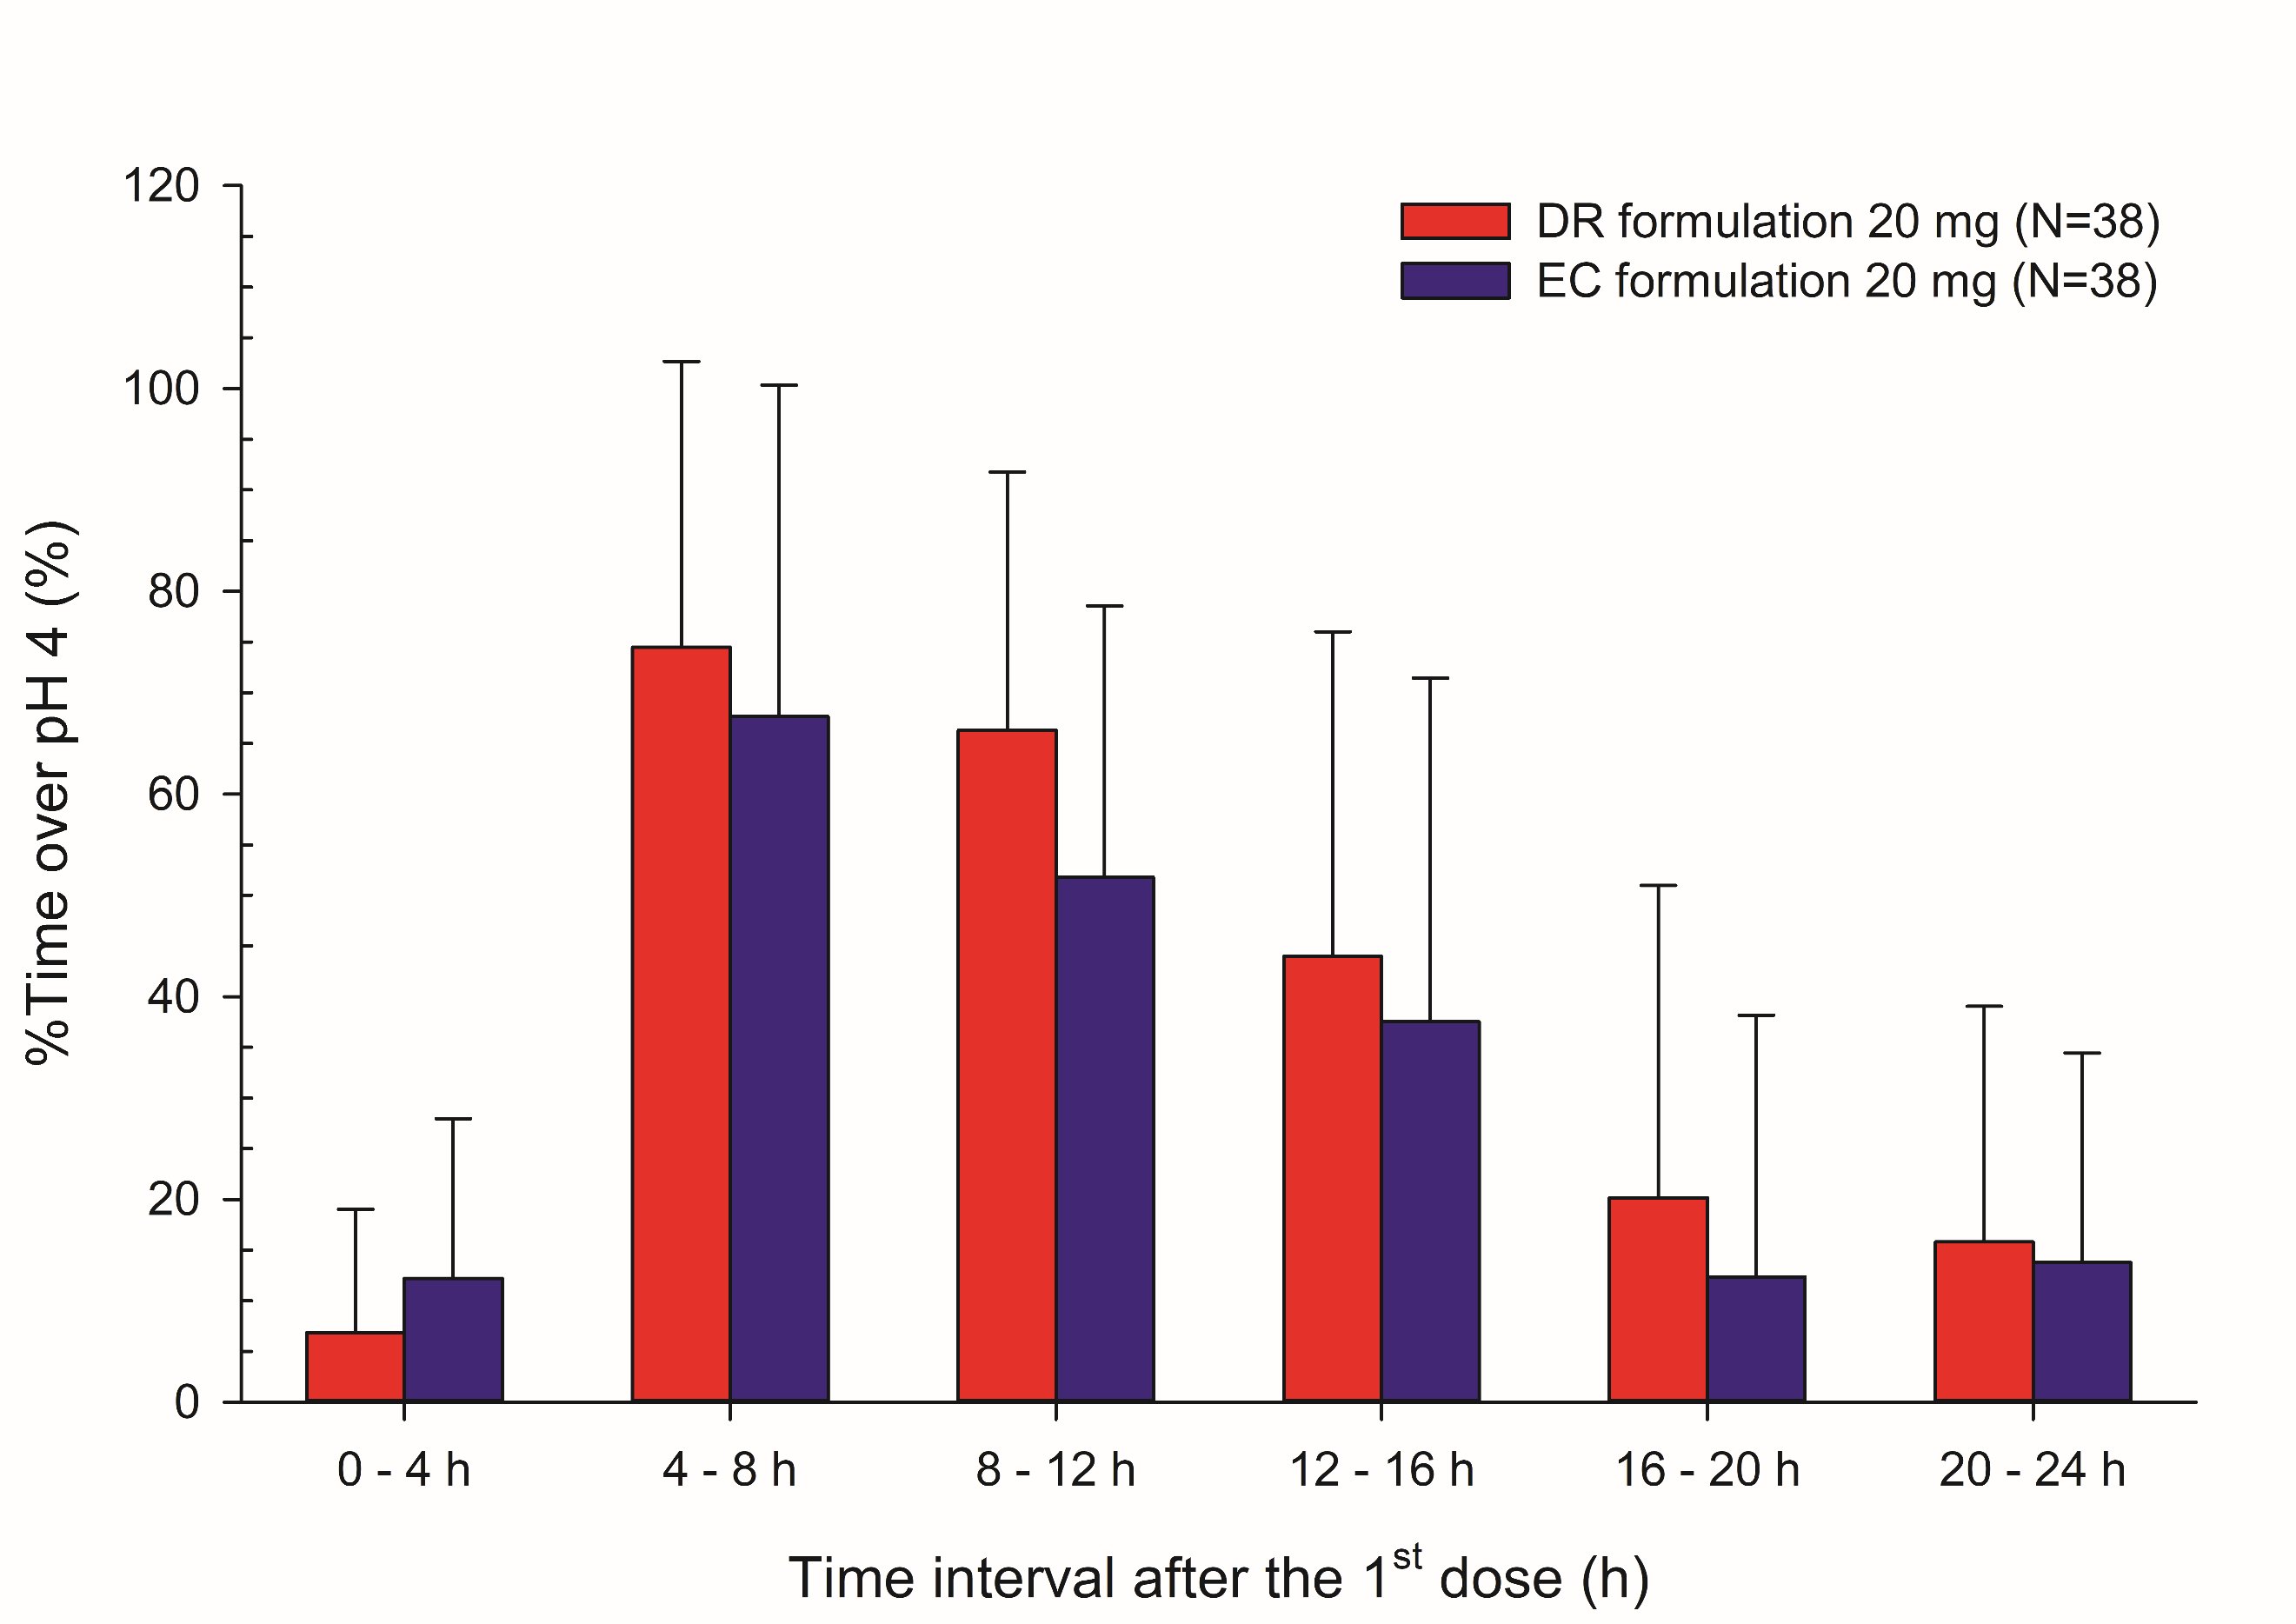** | **(B)** | **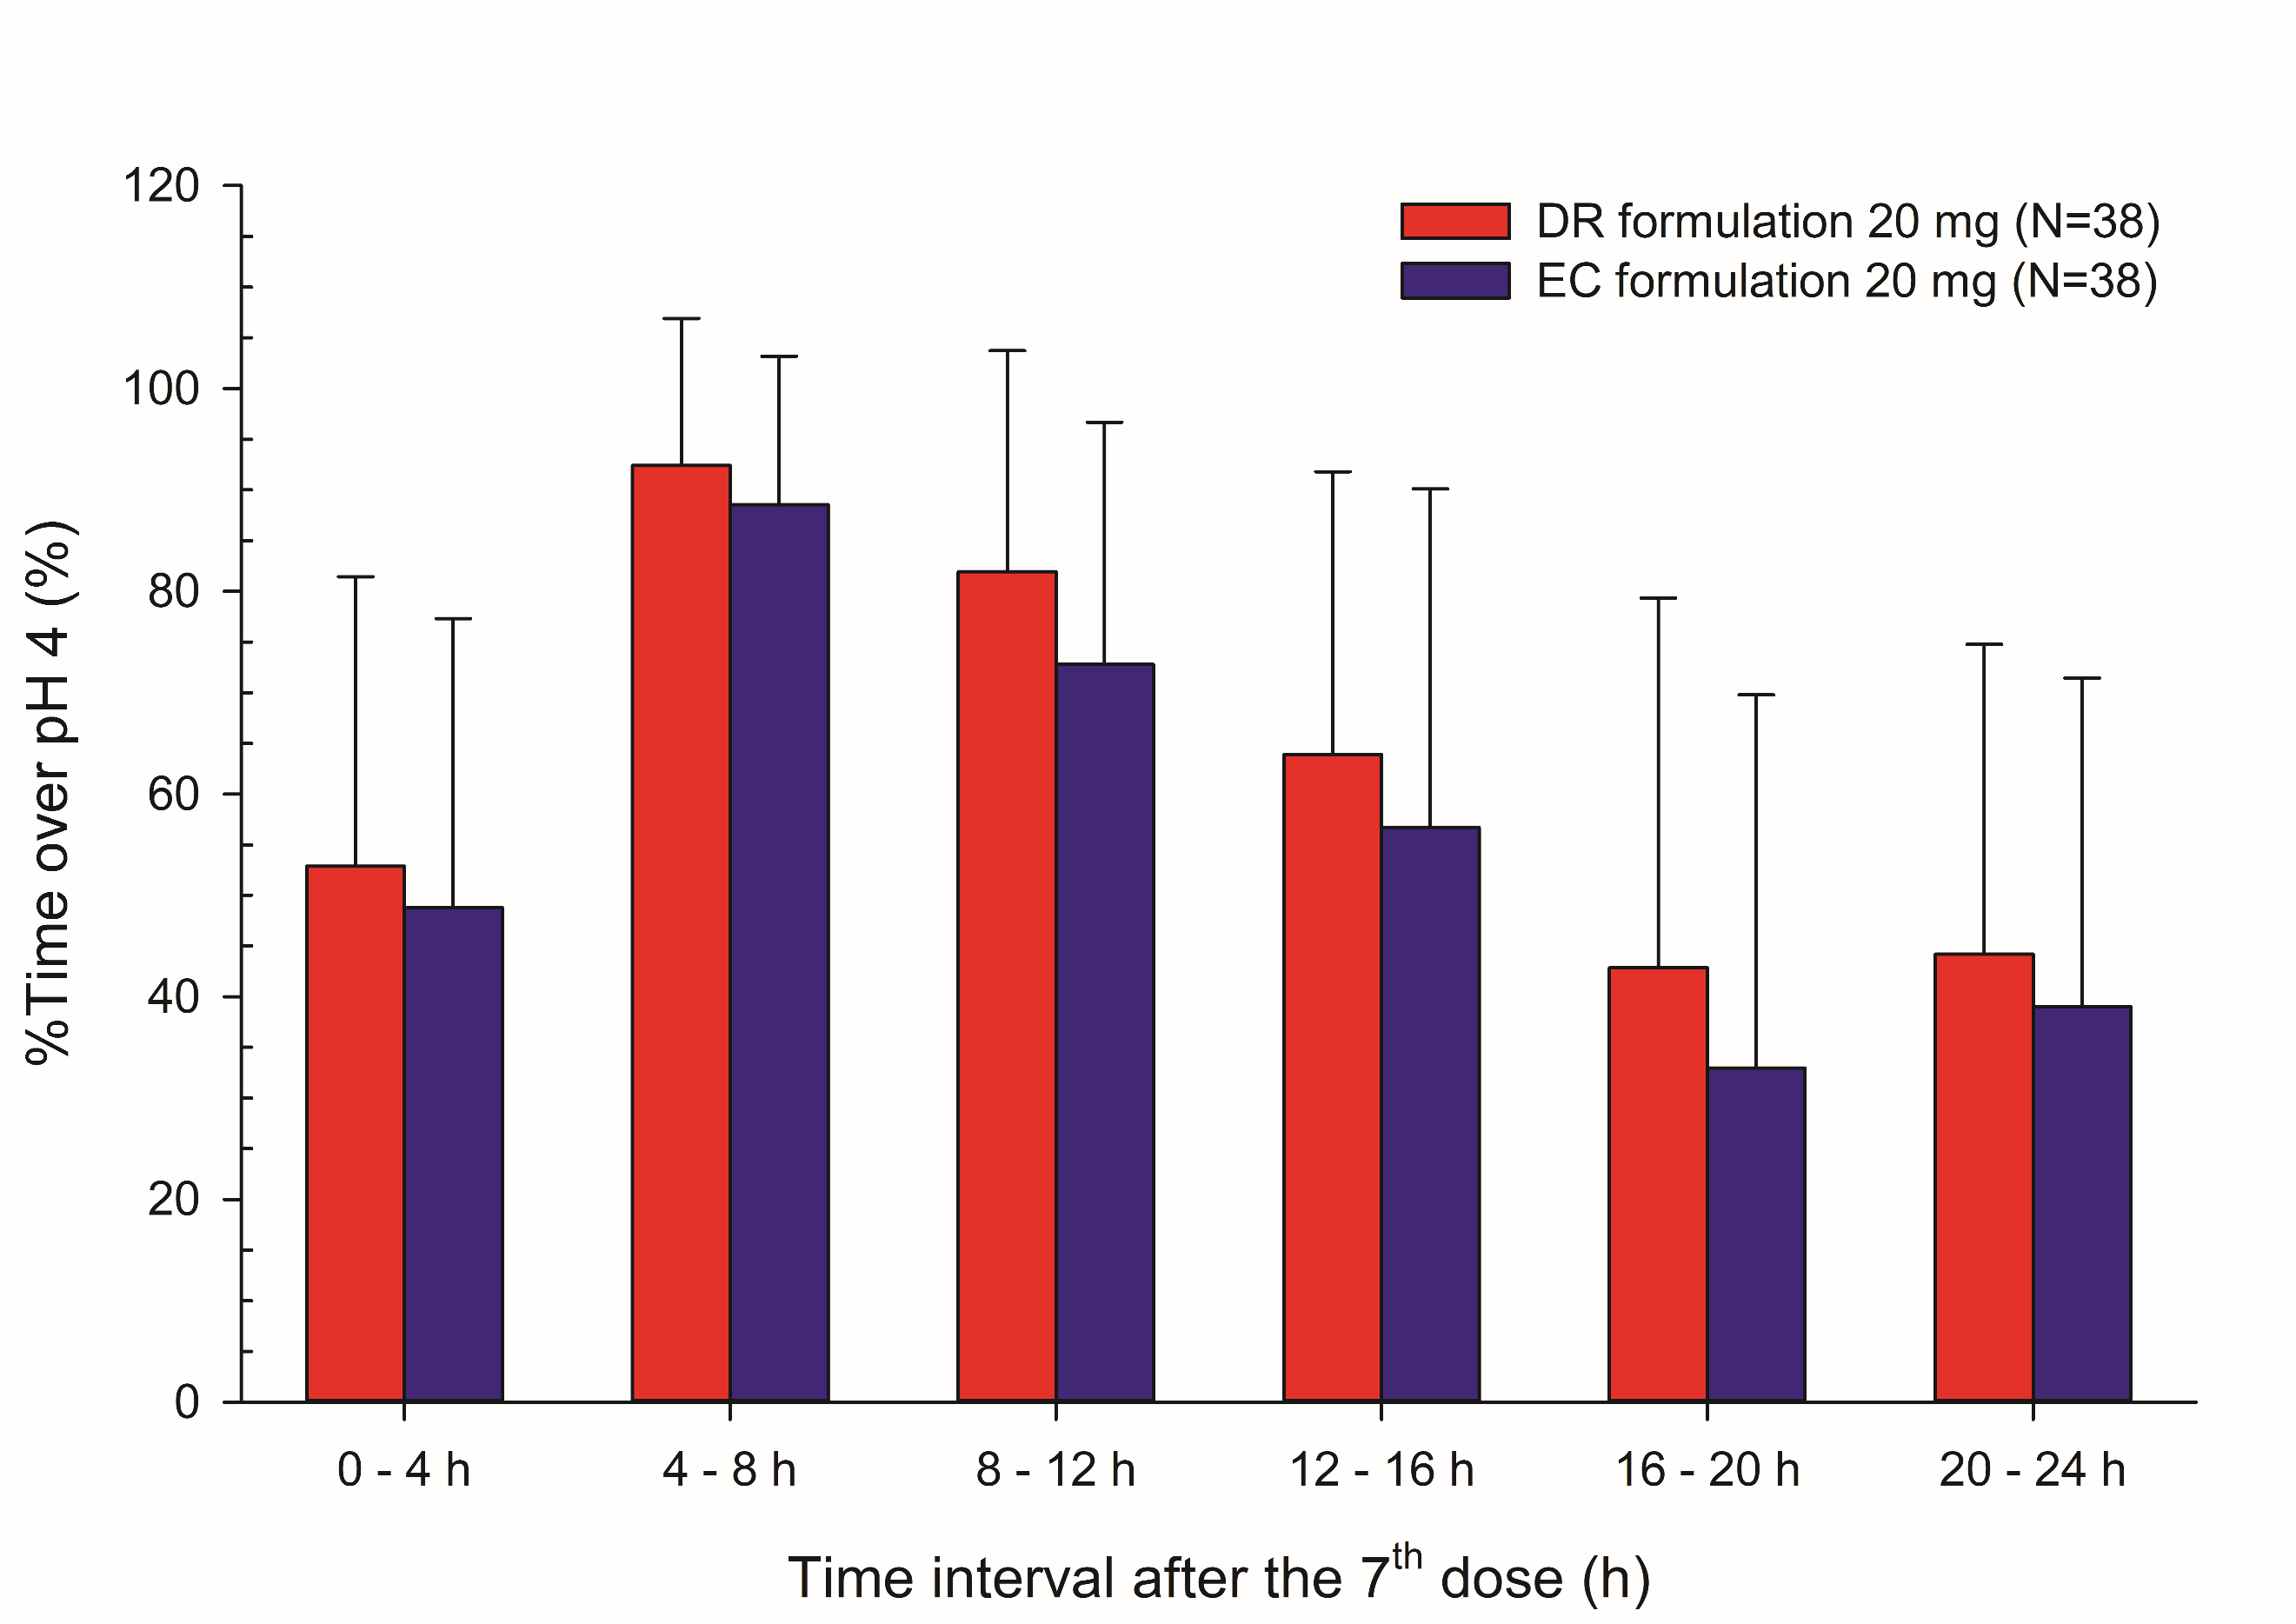** |
| --- | --- | --- | --- |
| **(C)** | **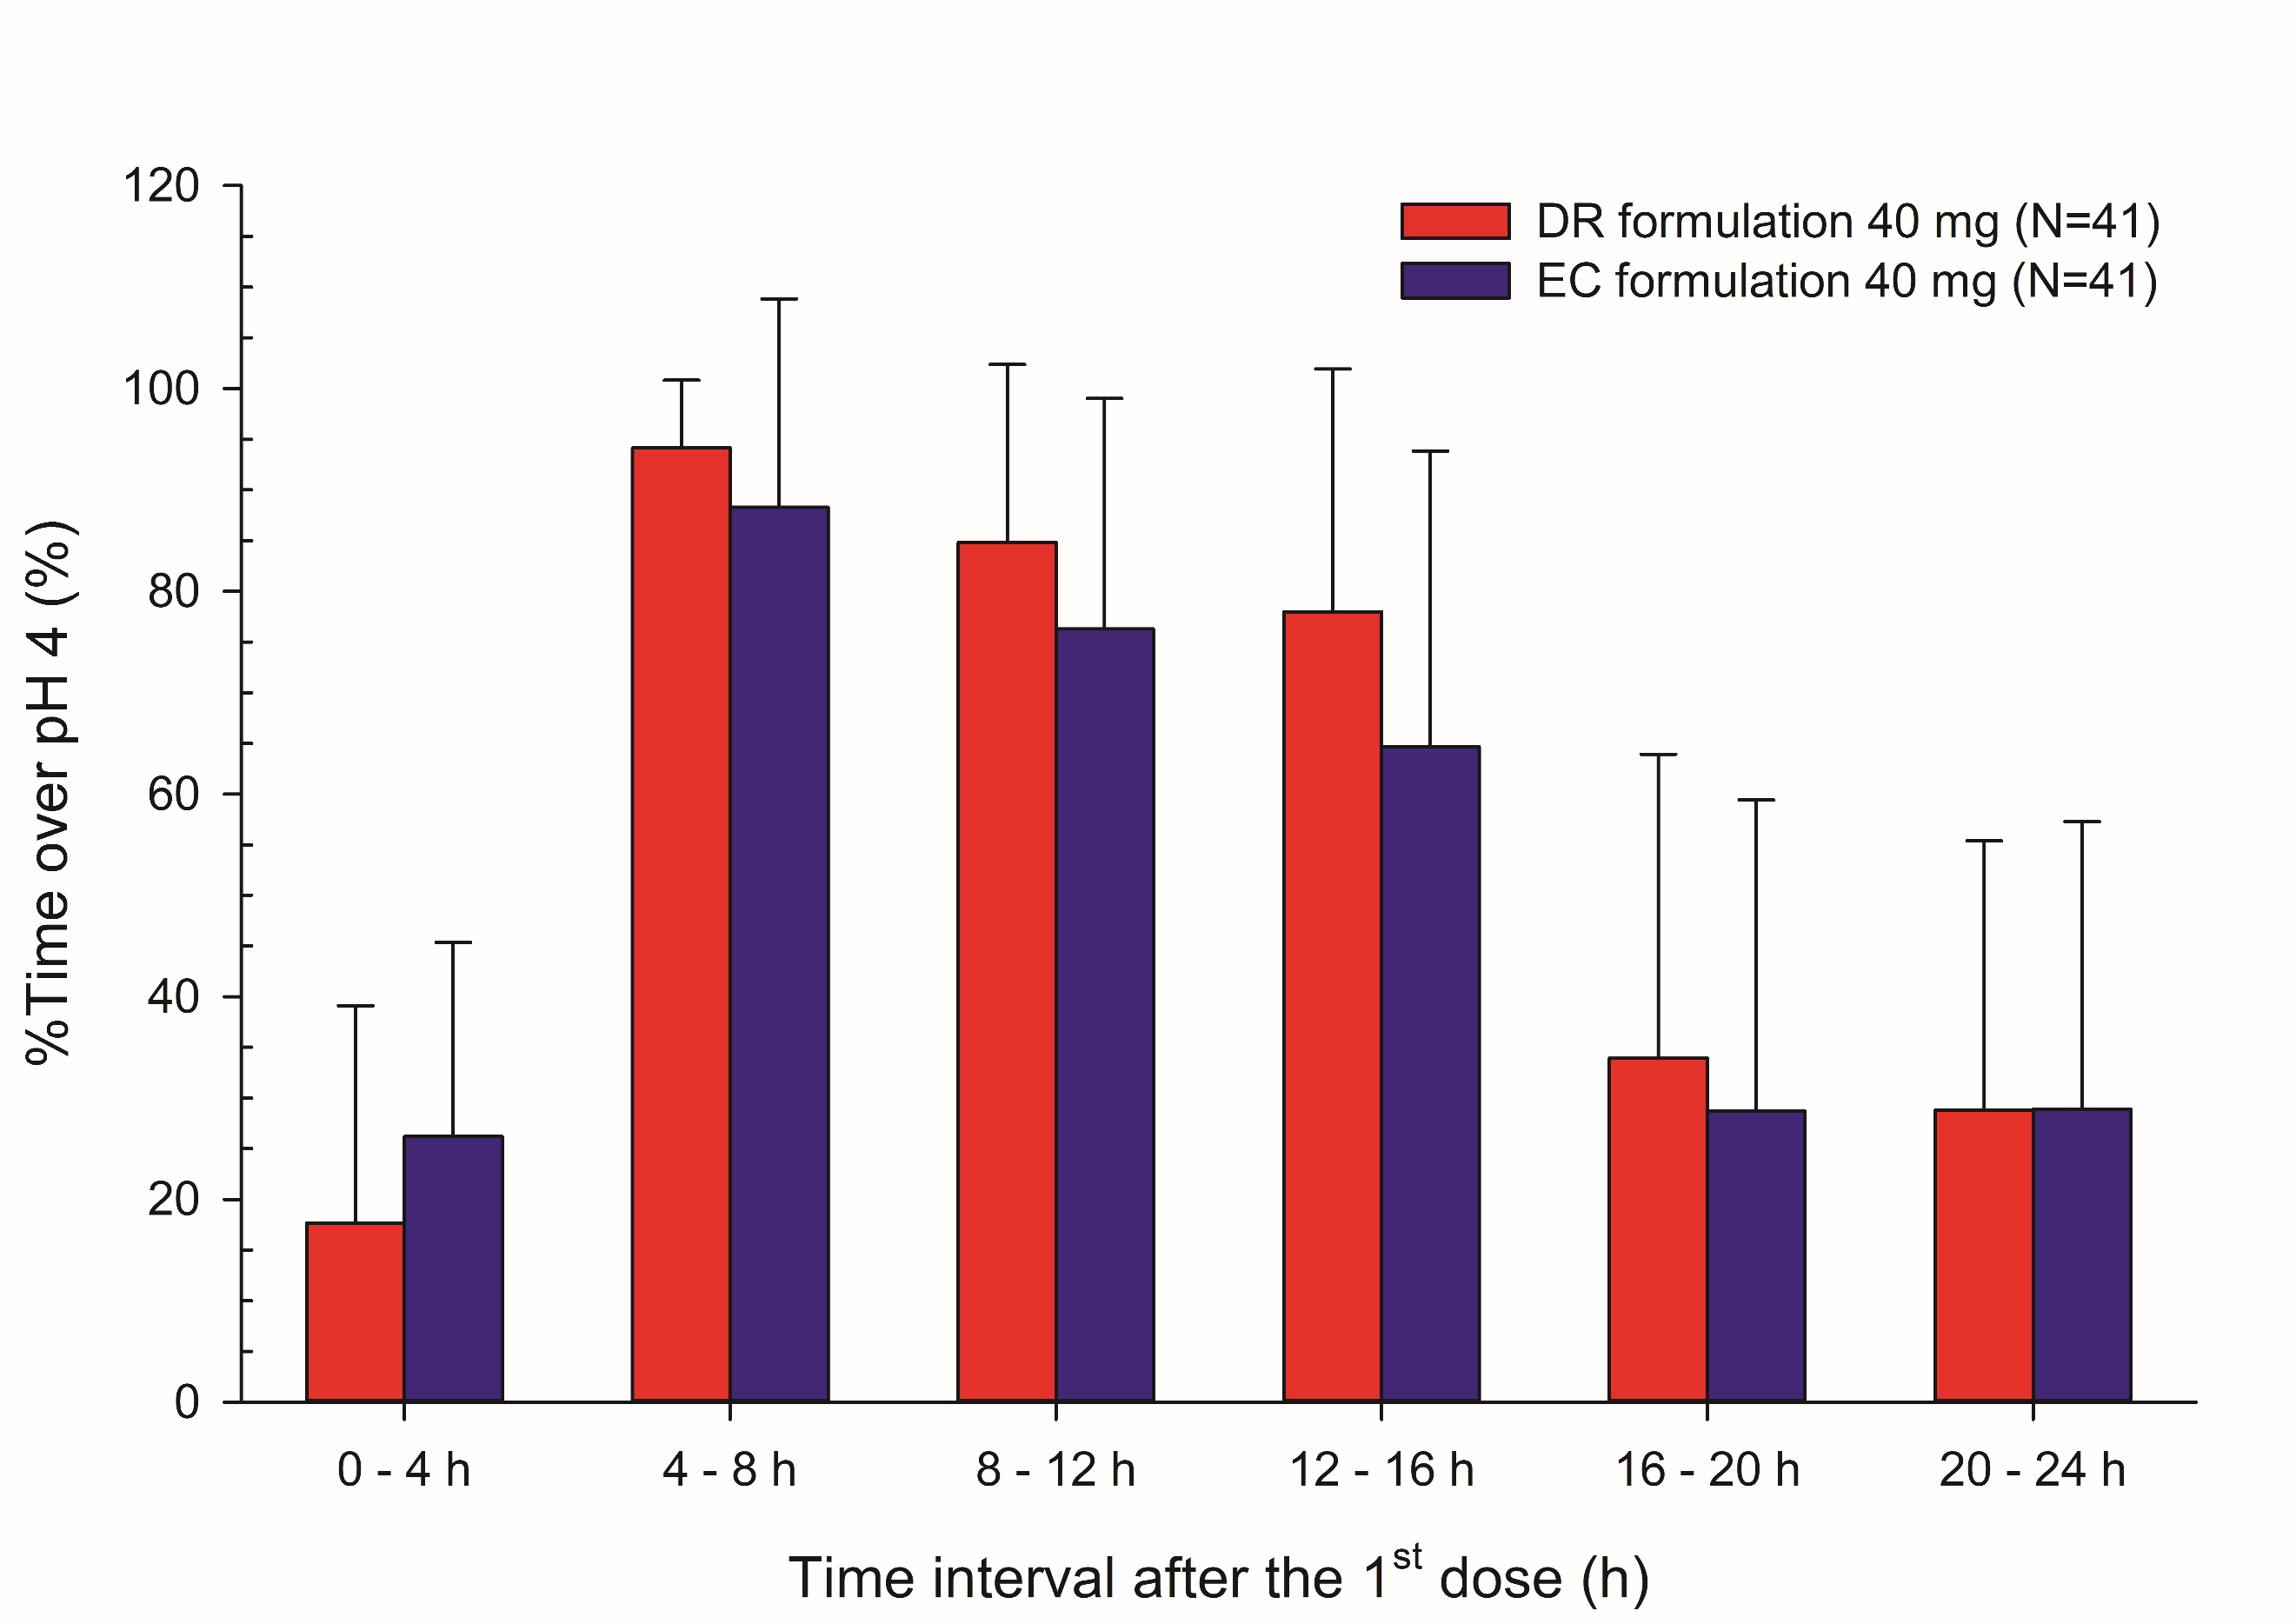** | **(D)** | **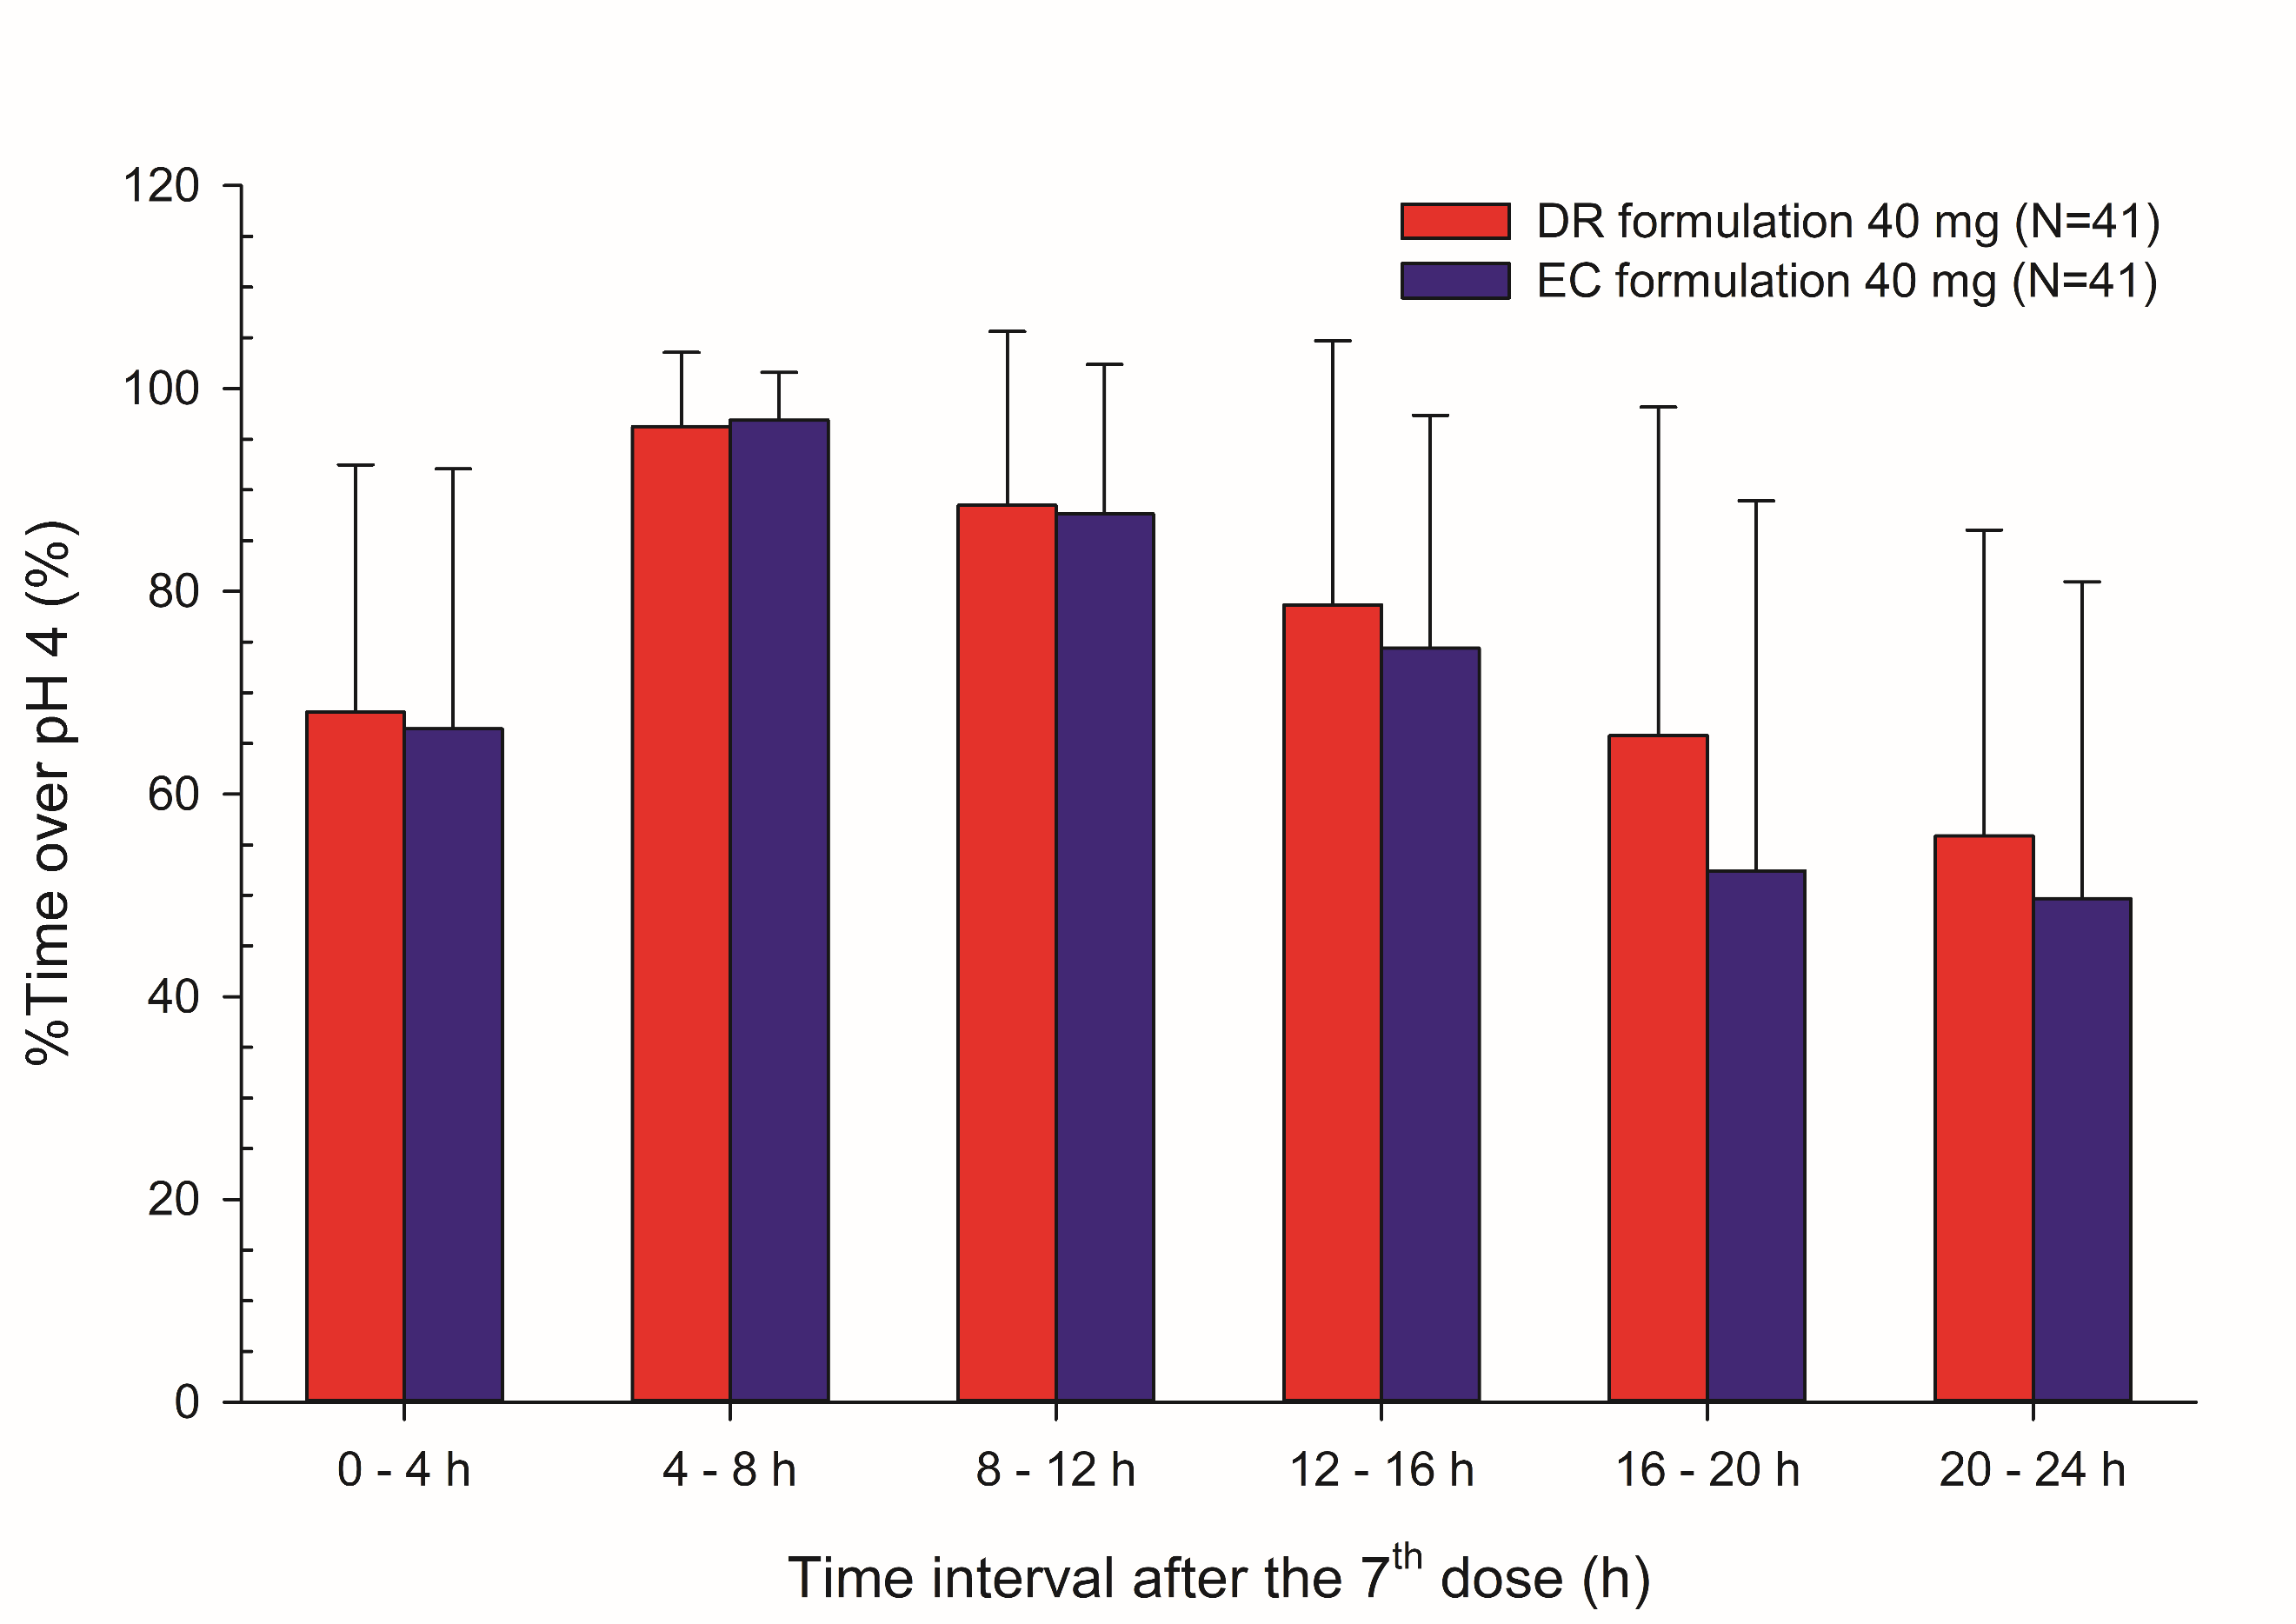** |

**Figure S2. Mean percentage of time with intragastric pH above 4 (%Time over pH 4) of esomeprazole per 4-hour interval for DR formulation or EC formulation after (A) the 1st and (B) the 7th dose in 20 mg dose group and after (C) the 1st and (D) the 7th dose in 40 mg dose group.**

**Notes:** The vertical bars represent standard deviation.

**Abbreviations:** DR, dual delayed-release; EC, enteric-coated.
